# Supplementary material for: Simultaneous whole-body multi-parametric 2-[18F]FDG-PET/MRI in smoldering multiple myeloma assessment : diagnostic and prognostic impact
Source: Research Square preprint supplement (doi:10.21203/rs.3.rs-6556935/v1), 2025-05-12
Supplement: Supplementary file 1 [file 5e882e246aebe4541eb34f34.docx]

**TABLE 1**

Patient’s clinical and biological characteristics

| Variable | Whole Cohort  n=116 |
| --- | --- |
| Median age | 66 (range, 32 to 87) |
| Male | 52/116 (45%) |
| Median serum monoclonal protein (g/L) | 17 (range, 3 to 49) |
| Median bone marrow plasma cell rate (%) | 13 (range, 1 to 55) |
| Median Involved/Uninvolved serum free light chain ratio | 6.5 (range, 0.5 to 97) |
| Type of monoclonal protein or free light chain  IgGκ  IgGλ  Κ  IgAλ  Λ  IgAκ | 48/116 (41%)  32/116 (28%)  4/116 (3%)  11/116 (10%)  5/116 (4%)  16/116 (14%) |

**TABLE 2**

Diagnostic performance of WB-2-[18F]FDG-PET/MRI imaging (as well as PET and MRI separately) for medullary (FL and diffuse BMI) or EMD detection in the total SMM population before imaging.

| Total population (n = 116) | ≥ 1 FL | ≥ 2 FLs | Diffuse BMI | EMD |
| --- | --- | --- | --- | --- |
| WB-2-[18F]FDG -PET/MRI  Positive  Negative | 23/116 (20%)  93/116 (80%) | 16/116 (14%)  100/116 (86%) | 65/116 (56%)  51/116 (44%) | 1/116 (0.9%)  115/116 (99.1%) |
| PET  Positive  MRI    Positive | 11/116 (9%)  23/116 (20%) | 7/116 (6%)  16/116 (14%) | 23/116 (20%)  62/116 (53%) | 1/116 (0.9%)  1/116 (0.9%) |

SMM : smoldering multiple myeloma ; FL : focal lesion ; BMI : bone marrow involvement ; WB: whole-body; 2-[18F]FDG: 2-[18F]fluorodeoxyglucose; PET: positron emission tomography; MRI: magnetic resonance imaging. EMD : extra-medullary disease.

**TABLE 3**

Univariate analysis of the prognostic value of baseline 2-[18F]FDG-PET/MRI/biological characteristics for PFS in SMM (N = 98 patients).

| Characteristic | Event/Total | HR | Lower HR 0.95 | Higher HR 0.95 | P-value | C-index |
| --- | --- | --- | --- | --- | --- | --- |
| Serum M-protein concentration (g/L) |  | 1.04 | 1.00 | 1.08 | **0.047** | 0.62 |
| Serum M-protein concentration (g/L) |  |  |  |  |  |  |
| ≥20 | 12/41 | 2.48 | 0.93 | 6.62 | 0.07 | 0.61 |
| (<20) | (6/45) | (1.00) |  |  |  |  |
| Bone marrow PC rate (%) |  | 1.06 | 1.02 | 1.10 | **0.004** | 0.61 |
| Bone marrow PC rate (%) |  |  |  |  |  |  |
| ≥22 | 7/13 | 3.78 | 1.50 | 9.53 | **0.005** | 0.60 |
| (<22) | (13/72) | (1.00) |  |  |  |  |
| Serum involved/uninvolved FLCr |  | 0.98 | 0.95 | 1.02 | 0.36 | 0.50 |
| Serum involved/uninvolved FLCr |  |  |  |  |  |  |
| ≥20 | 4/22 | 0.96 | 0.32 | 2.90 | 0.94 | 0.49 |
| (<20) | (15/67) | (1.00) |  |  |  |  |
| PET diffuse BMI |  |  |  |  |  |  |
| positive | 4/17 | 1.05 | 0.35 | 3.14 | 0.92 | 0.51 |
| (negative) | (17/81) | (1.00) |  |  |  |  |
| SUVmaxBM |  | 1.41 | 0.93 | 2.14 | 0.11 | 0.57 |
| PET 1 FL |  |  |  |  |  |  |
| positive | 1/2 | 9.84 | 1.22 | 79.15 | **0.03** | 0.53 |
| (negative) | (20/96) | (1.00) |  |  |  |  |
| MRI diffuse BMI |  |  |  |  |  |  |
| positive | 18/49 | 6.12 | 1.8 | 20.8 | **0.004** | 0.67 |
| (negative) | (3/49) | (1.00) |  |  |  |  |
| ADCmeanBMI |  | 1.00 | 1.00 | 1.01 | 0.32 | 0.58 |
| MRI 1 FL |  |  |  |  |  |  |
| positive | 3/6 | 4.43 | 1.28 | 15.32 | **0.02** | 0.57 |
| (negative) | (18/92) | (1.00) |  |  |  |  |
| PEI |  | 1.02 | 1.01 | 1.03 | **<0.001** | 0.69 |
| PEI |  |  |  |  |  |  |
| ≥95.41 a.u | 9/14 | 5.82 | 2.39 | 14.20 | **<0.001** | 0.67 |
| (<95.41) | (11/78) | (1.00) |  |  |  |  |
| TPEI |  | 0.98 | 0.95 | 1.00 | 0.09 | 0.65 |
| MITR |  | 1.19 | 1.08 | 1.31 | **<0.001** | 0.70 |
| MITR |  |  |  |  |  |  |
| ≥6.1 a.u/sec | 11/22 | 4.85 | 2.00 | 11.76 | **<0.001** | 0.67 |
| (<6.1) | (9/70) | (1.00) |  |  |  |  |

SMM : smoldering multiple myeloma ; PFS : progression-free survival ; HR : hazard ratio ; C-index : concordance index ; M-protein : monoclonal-protein ; PC : plasma cell ; FLCr : free light chain ratio ; BMI : bone marrow involvement ; SUVmax : maximum standardized uptake value ; FL : focal lesion ; ADCmean : mean value of apparent diffusion coefficient ; PEI : peak enhancement intensity ; TPEI : time to PEI ; MITR : maximum intensity time ratio = PEI/TPEI ; a.u : arbitrary unit.

**TABLE 4**

Multivariate analyses of the prognostic value for PFS (two different models)

| **Model 1**  Characteristic | HR | Lower HR 0.95 | Higher HR 0.95 | P-value |
| --- | --- | --- | --- | --- |
| Bone marrow PC rate | 1.04 | 0.99 | 1.08 | 0.1 |
| MRI diffuse BMI | 3.79 | 1.04 | 13.8 | **0.04** |
| PEI | 1.01 | 1 | 1.02 | 0.11 |
|  |  |  |  |  |
| **Model 2** |  |  |  |  |
| Bone marrow PC rate | 1.04 | 1 | 1.09 | 0.06 |
| MRI diffuse BMI | 4.16 | 1.15 | 15.03 | **0.03** |
| MITR | 1.08 | 0.95 | 1.23 | 0.24 |

HR: hazard ratio; PC: plasma cell; BMI: bone marrow involvement; PEI: peak enhancement intensity; MITR: maximum intensity time ratio = PEI/TPEI
